# Supplementary material for: Covid-19 on Twitter: an analysis of risk communication with visuals
Source: Research Square preprint supplement (doi:10.21203/rs.3.rs-195119/v1), 2021-02-03
Supplement: Supplementary file 1 [file 6b29a264c952502dba88f5da.csv]

What	Total
One topic	341
Two topics	205
Three topics	48
Four topics	22
