# Supplementary material for: Covid-19 on Twitter: an analysis of risk communication with visuals
Source: Research Square preprint supplement (doi:10.21203/rs.3.rs-195119/v1), 2021-02-03
Supplement: Supplementary file 2 [file 795cb3c866c9d63eb3ecda42.csv]

What	Total
Detection	45
Impact	170
Other	0
Treatment	2
None	341
