# Supplementary material for: Covid-19 on Twitter: an analysis of risk communication with visuals
Source: Research Square preprint supplement (doi:10.21203/rs.3.rs-195119/v1), 2021-02-03
Supplement: Supplementary file 3 [file a0545b4f3ec4d0c0f4e63540.csv]

Month	Only Health Gain	Only Health Loss	Both Gain & Loss	Neither	Total
Jan	20	36	7	27	90
Feb	11	15	3	19	48
Mar	29	29	4	41	103
Apr	18	20	4	12	54
May	18	10	0	8	36
Jun	16	9	0	6	31
Jul	12	34	4	24	74
Aug	19	46	3	37	105
Sep	19	5	5	7	36
Oct	6	25	1	7	39
