# Supplementary material for: Covid-19 on Twitter: an analysis of risk communication with visuals
Source: Research Square preprint supplement (doi:10.21203/rs.3.rs-195119/v1), 2021-02-03
Supplement: Supplementary file 4 [file adf8cd8af357ecffd4f7bcf8.csv]

Month	Combination	Criticism	Entertainment	Gratitude	None	Total
Jan	2	2	8	6	72	90
Feb	1	7	4	3	33	48
Mar	2	11	11	7	72	103
Apr	0	5	9	4	36	54
May	3	9	8	4	12	36
Jun	0	11	1	2	17	31
Jul	1	32	9	2	30	74
Aug	0	87	4	1	13	105
Sep	0	12	4	2	18	36
Oct	0	22	5	0	12	39
