# Supplementary material for: Covid-19 on Twitter: an analysis of risk communication with visuals
Source: Research Square preprint supplement (doi:10.21203/rs.3.rs-195119/v1), 2021-02-03
Supplement: Supplementary file 5 [file c4db2847947fff1bc786c7df.csv]

from	to	weight
Diagram: process, flow of results...	Composite Graphics (multiple-images)	0.01511879
Graph: show quantitative relationships	Composite Graphics (multiple-images)	0.00647948
Graph: show quantitative relationships	Diagram: process, flow of results...	0.00215983
Illustrations or rendered pictures	Composite Graphics (multiple-images)	0.06479482
Illustrations or rendered pictures	Diagram: process, flow of results...	0.01511879
Illustrations or rendered pictures	Graph: show quantitative relationships	0.00215983
Models (such as 3d)	Composite Graphics (multiple-images)	0.01727862
Models (such as 3d)	Diagram: process, flow of results...	0
Models (such as 3d)	Graph: show quantitative relationships	0
Models (such as 3d)	Illustrations or rendered pictures	0.01943844
Photograph	Composite Graphics (multiple-images)	0.08855292
Photograph	Diagram: process, flow of results...	0.00647948
Photograph	Graph: show quantitative relationships	0.00215983
Photograph	Illustrations or rendered pictures	0.01511879
Photograph	Models (such as 3d)	0.00647948
Symbol: pictographic or abstract	Composite Graphics (multiple-images)	0.06911447
Symbol: pictographic or abstract	Diagram: process, flow of results...	0.02807775
Symbol: pictographic or abstract	Graph: show quantitative relationships	0.01511879
Symbol: pictographic or abstract	Illustrations or rendered pictures	0.21814255
Symbol: pictographic or abstract	Models (such as 3d)	0.02591793
Symbol: pictographic or abstract	Photograph	0.38228942
