# Supplementary material for: Covid-19 on Twitter: an analysis of risk communication with visuals
Source: Research Square preprint supplement (doi:10.21203/rs.3.rs-195119/v1), 2021-02-03
Supplement: Supplementary file 6 [file cfa12bdd43c097efd8026071.csv]

What	Total	Percent
Composite	2	0.80%
Diagram	5	1.90%
Graph	17	6.50%
Illustrations	29	11.10%
Models	2	0.80%
Photograph	181	69.30%
Symbol	25	9.60%
