# Supplementary material for: Covid-19 on Twitter: an analysis of risk communication with visuals
Source: Research Square preprint supplement (doi:10.21203/rs.3.rs-195119/v1), 2021-02-03
Supplement: Supplementary file 7 [file f2c410d5f1e037e44df52f6c.csv]

Month	Health / Gov	Individual	Media	Other	Private Sector	Total
Jan	37	17	36	0	0	90
Feb	11	15	21	1	0	48
Mar	15	52	30	4	2	103
Apr	5	26	18	1	4	54
May	4	20	11	1	0	36
Jun	6	20	4	1	0	31
Jul	5	46	22	1	0	74
Aug	4	69	27	5	0	105
Sep	3	22	11	0	0	36
Oct	3	28	8	0	0	39
